# Supplementary material for: Oral or Topical Exposure to Glyphosate in Herbicide Formulation Impacts the Gut Microbiota and Survival Rates of Honey Bees
Source: PubMed Central journal article supplement (PMC7480383; doi:10.1128/aem.01150-20), 2020-09-01
Supplement: AEM.01150-20-s0001.pdf [file AEM.01150-20-s0001.pdf]

## Supplemental Material

### Oral and topical exposure to glyphosate in herbicide formulation impact the gut microbiota and survival rates of honey bees

Erick V. S. Motta<sup>1\*</sup>, Myra Mak<sup>1</sup>, Tyler K. De Jong<sup>1</sup>, J. Elijah Powell<sup>1</sup>, Angela O'Donnell<sup>1</sup>, Kristin J. Suhr<sup>2</sup>, Ian M. Riddington<sup>2</sup>, Nancy A. Moran<sup>1\*</sup>

#### Affiliations:

<sup>1</sup>Department of Integrative Biology, University of Texas at Austin, Texas, USA

<sup>2</sup>Mass Spectrometry Facility, Department of Chemistry, University of Texas at Austin, Texas, USA

#### \*Corresponding authors:

Erick V. S. Motta and Nancy A. Moran

2506 Speedway, Austin, TX 78712

Emails: [erickvsm@utexas.edu](mailto:erickvsm@utexas.edu) and [nancy.moran@austin.utexas.edu](mailto:nancy.moran@austin.utexas.edu)

#### This PDF file includes:

Figures S1 to S12

Tables S1 to S6

References

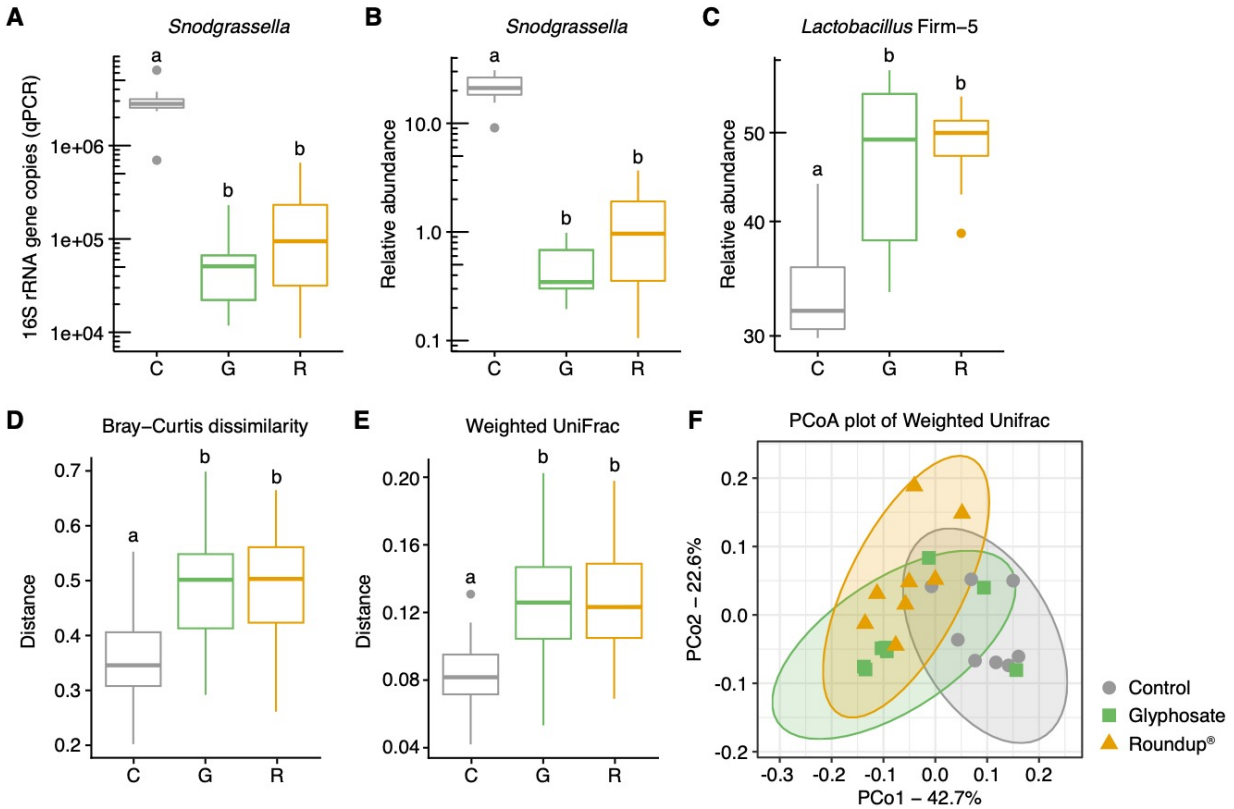

**Figure S1. The effects of glyphosate and Roundup® formulation on the honey bee gut microbiota.**

(A) *Snodgrassella* absolute abundance estimated by qPCR, and (B) *Snodgrassella* and (C) *Lactobacillus Firm-5* relative abundances estimated by 16S rRNA amplicon sequencing in the guts of bees sampled from Control, Glyphosate and Roundup® groups (n = 8 for each group). (D) Bray-Curtis and (E) weighted UniFrac dissimilarity distances in gut communities among control bees versus between control bees and treatment bees. Groups with distinct letters are statistically different ( $P < 0.05$ , Kruskal-Wallis test followed by Dunn's multiple comparisons test). (F) Principal coordinate analysis of weighted UniFrac dissimilarity of gut community compositions of Control, Glyphosate and Roundup® groups (for significance, see Table S1).

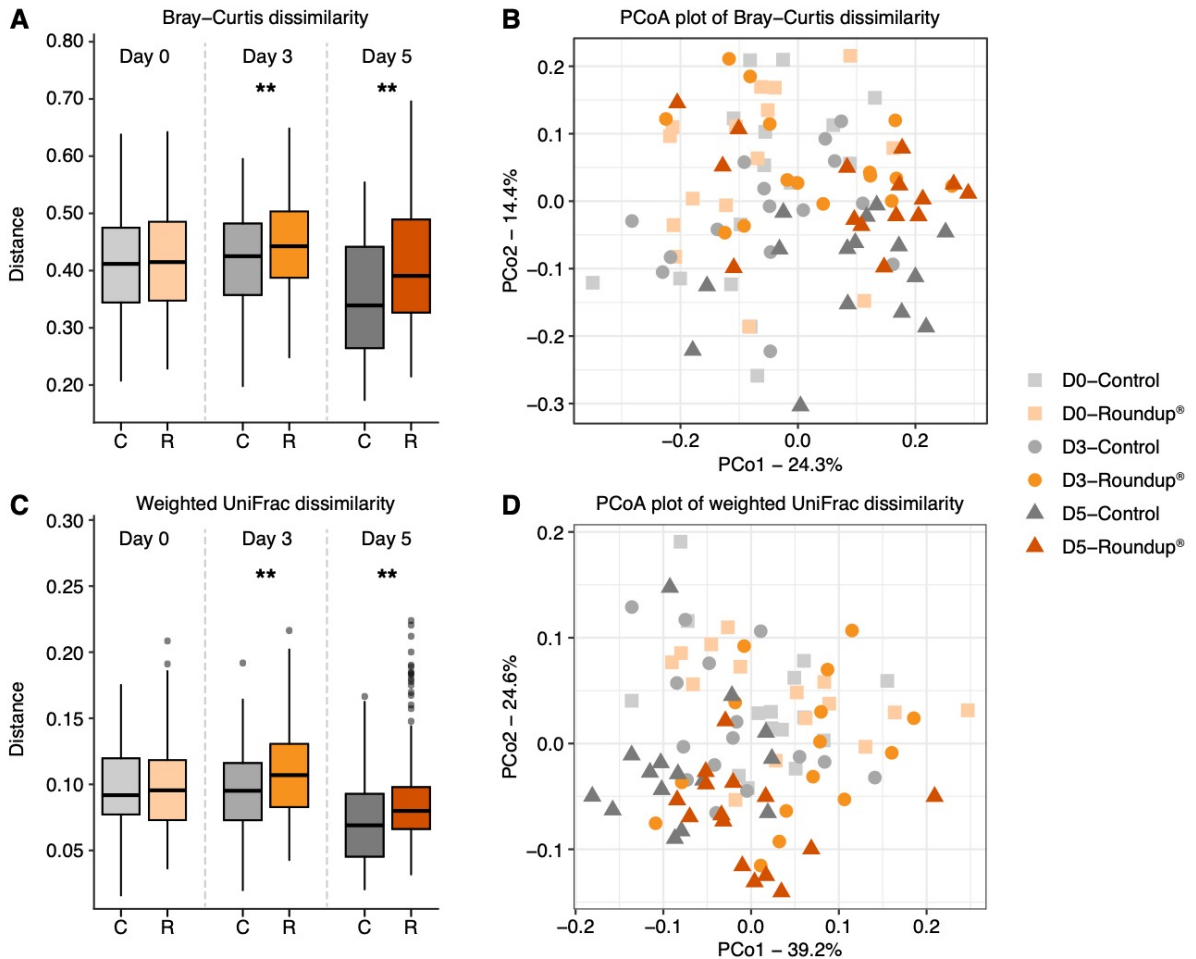

**Figure S2. Changes in microbial diversity in bees orally exposed to 0.1% Roundup® formulation.**

Boxplots show **(A)** Bray-Curtis and **(B)** weighted UniFrac dissimilarity distances in gut communities among control bees versus between control bees and treatment bees.  $**P < 0.01$ , Kruskal-Wallis test followed by Dunn’s multiple comparisons test. Principal coordinate analysis of **(C)** Bray-Curtis and **(D)** weighted UniFrac dissimilarities of gut community compositions of control and treatment groups, respectively. Pairwise Permanova test with 999 permutations was used to compare control and treatment samples per sampling time (for significance, see Table S2).

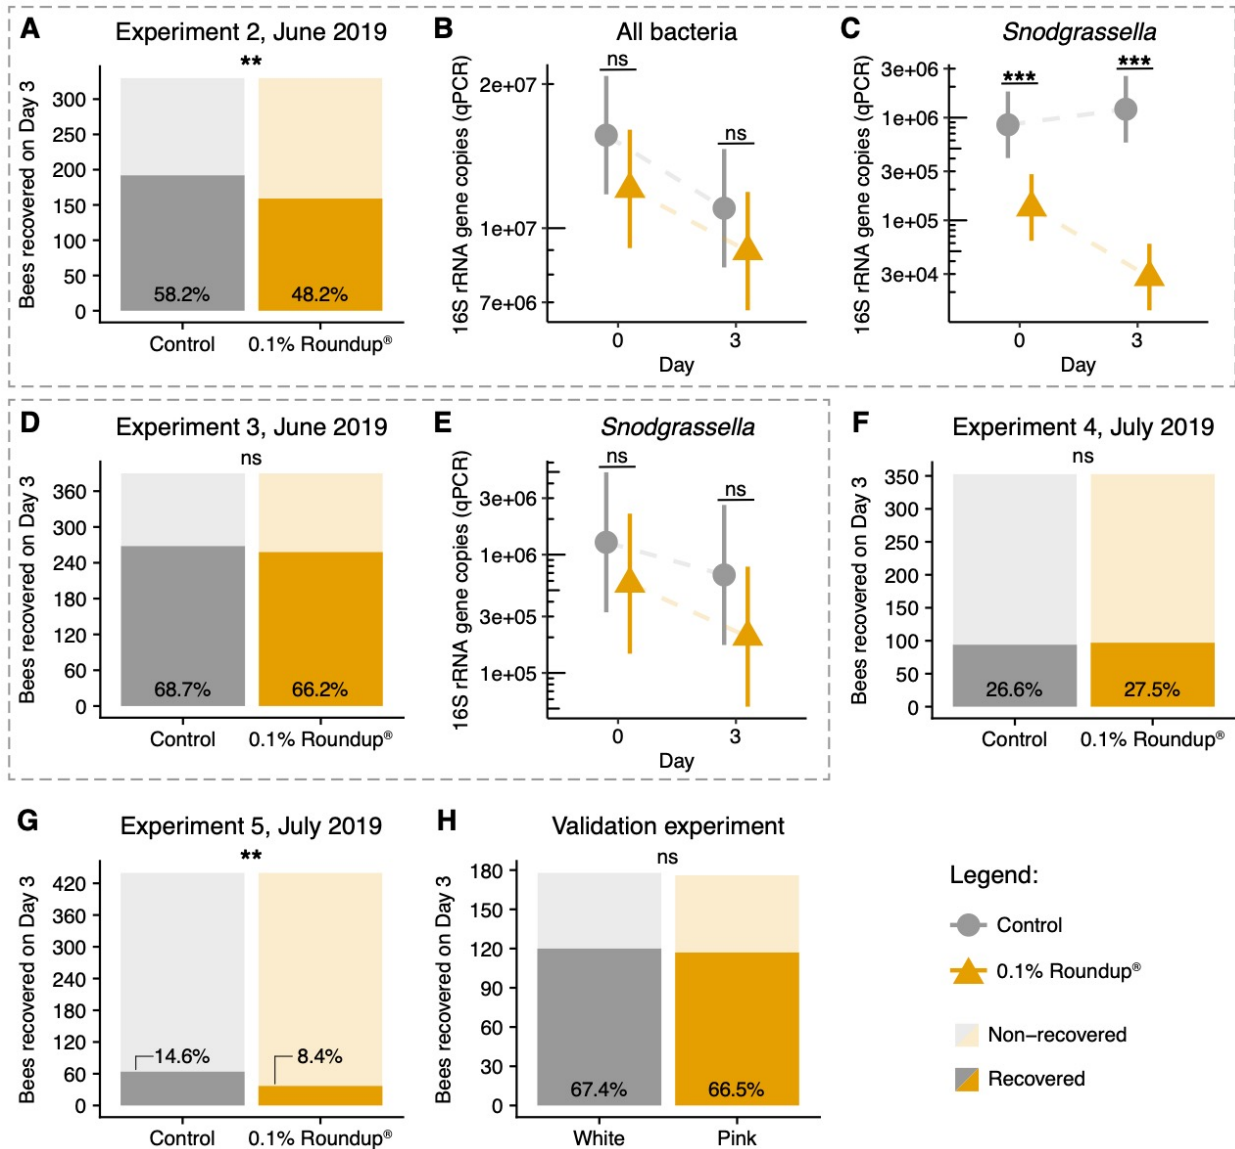

**Figure S3. Recovery rates of honey bees orally exposed to 0.1% Roundup® formulation.**

(A, B, C) Experiment 2; (D, E) Experiment 3; (F, G) Experiments 4 and 5; (H) Experiment to test color-bias in recovery experiments between the two colors used, pink and white. Stacked column graphs show the number of worker bees recovered from different hives at different seasons at day 3 post-treatment (\*\* =  $P < 0.01$ , ns = nonsignificant difference, Chi-squared test). Scatter plots show total bacterial and *Snodgrassella* abundances in the guts of worker bees sampled at days 0 and 3 post-treatment of experiments 2 and 3 ( $n = 15$  for each group and time point). For more details, see Table S3.

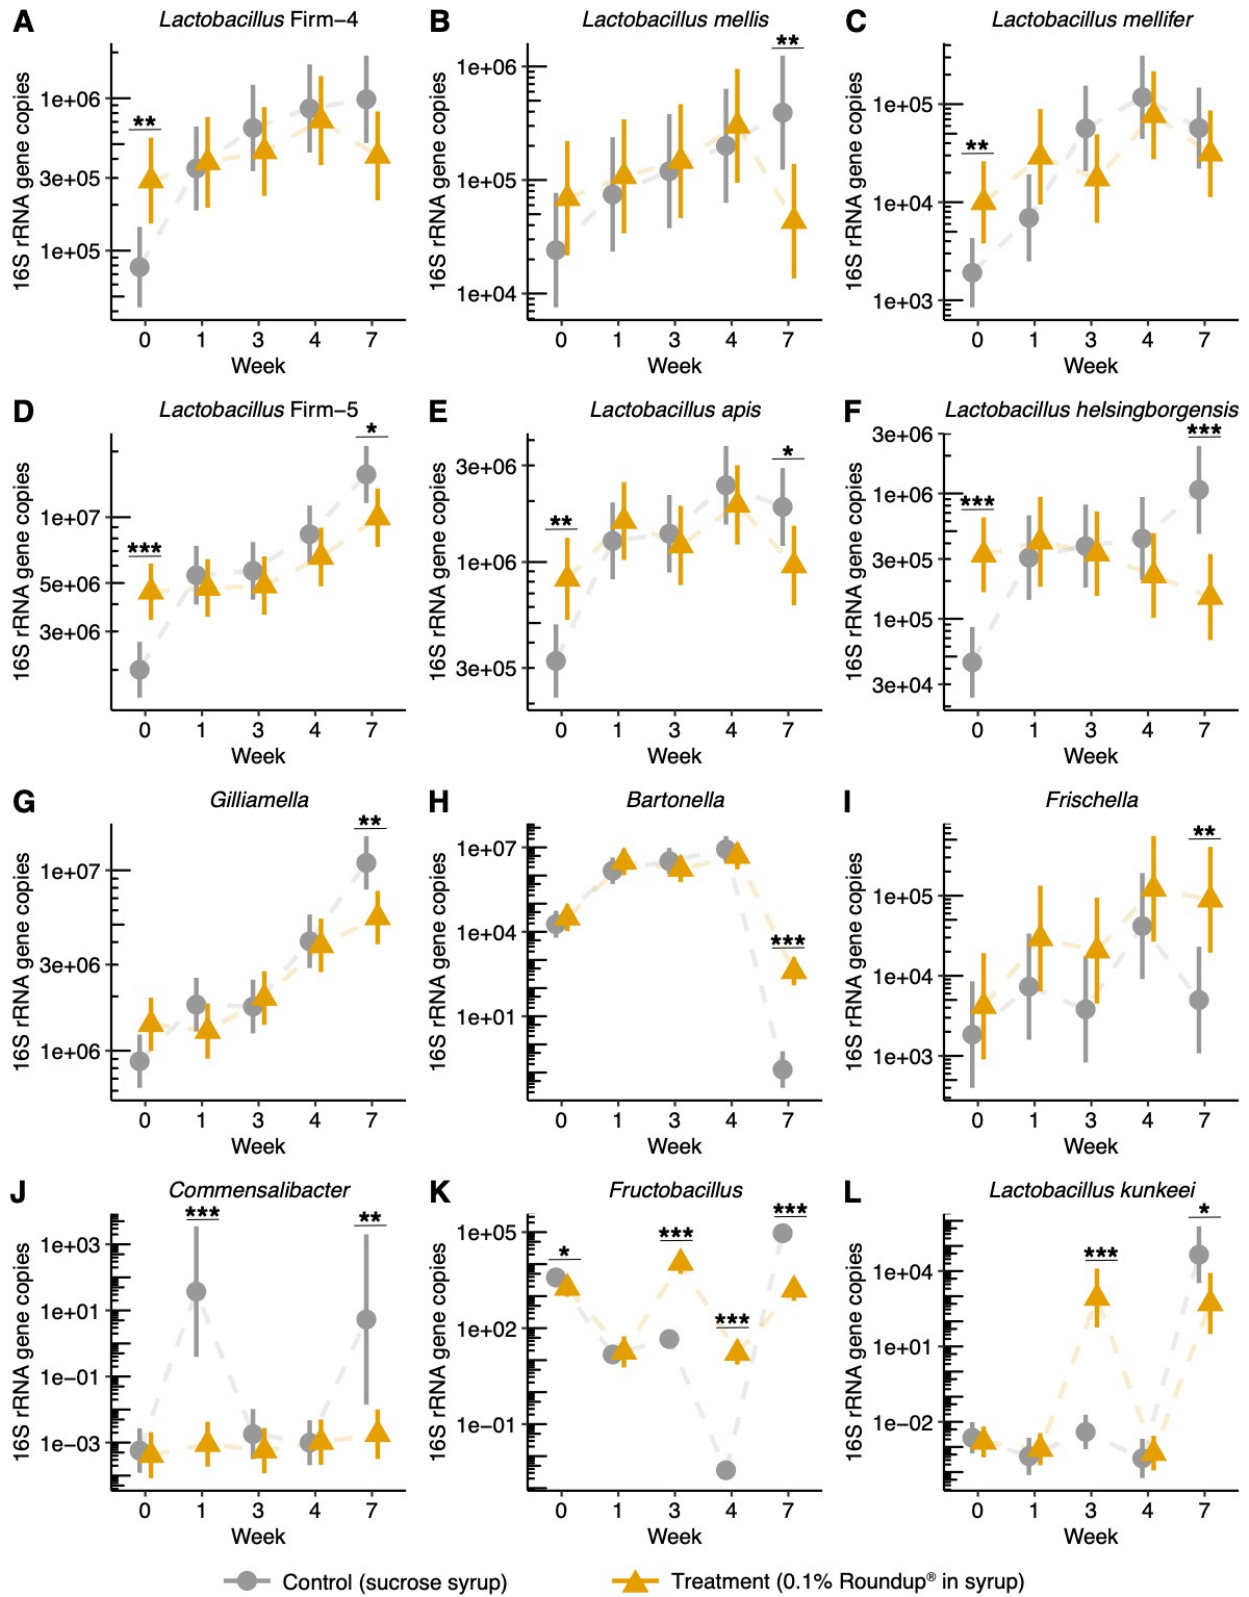

**Figure S4. Gut microbial perturbations in honey bees from hives exposed to 0.1% Roundup® in sucrose syrup in site 1, 2018.**

Scatter plots of estimates of absolute abundance for **(A)** *Lactobacillus* Firm-4, including **(B)** *Lactobacillus mellis* and **(C)** *Lactobacillus mellifer*, **(D)** *Lactobacillus* Firm-5, including **(E)** *Lactobacillus apis* and **(F)** *Lactobacillus helsingborgensis*; **(G)** *Gilliamella*; **(H)** *Bartonella*; **(I)** *Frischella*; **(J)** *Commensalibacter*; **(K)** *Fructobacillus*; and **(L)** *Lactobacillus kunkeei* in the guts of bees sampled from control (sucrose syrup) and treatment (0.1% Roundup® in syrup) groups on weeks 0, 1, 3, 4 and 7, with error bars of 95% confidence interval. Generalized linear mixed-effects models assuming Poisson regression were used to compare changes in bacterial abundances between control and treatment groups (n = 5 hives per group, 15 bees per hive) per sampling time. Mixed models were fitted using the package lme4 (1) and followed by *post hoc* tests using the package emmeans (2). \* $P < 0.05$ , \*\* $P < 0.01$  and \*\*\* $P < 0.001$ .

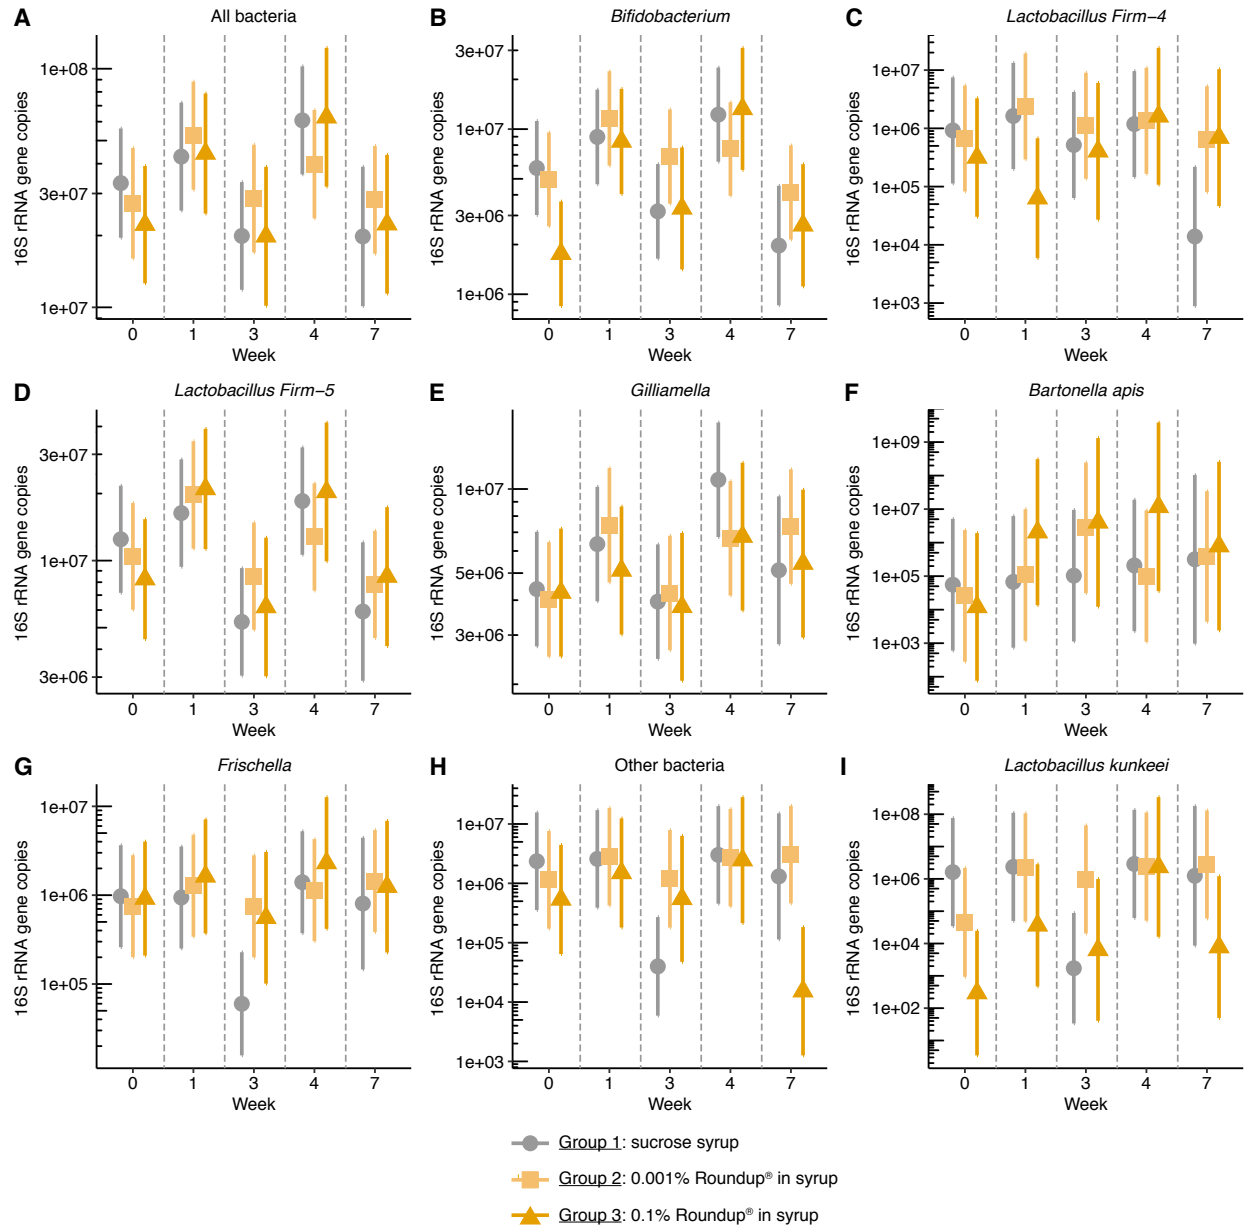

**Figure S5. Gut microbial perturbations in honey bees from hives exposed to 0.001% or 0.1% Roundup® in syrup in site 1, 2019.**

Scatter plots of estimates of absolute abundance for (A) total bacteria; (B) *Bifidobacterium*; (C) *Lactobacillus Firm-4*; (D) *Lactobacillus Firm-5*; (E) *Gilliamella*; (F) *Bartonella*; (G) *Frischella*; (H) and other bacteria, including (I) *Lactobacillus kunkeei* in the guts of bees sampled from control (sucrose syrup) and treatment (0.001% or 0.1% Roundup® in syrup) groups on weeks 0, 1, 3, 4 and 7, with error bars of 95% confidence interval. For group 1: n = 5 for weeks 0, 1, 3 and 4; n = 3 for week 7. For group 2: n = 5. For group 3: n = 4 for weeks 0 and 1; n = 3 for weeks 3, 4 and 7. Each hive is represented by 15 pooled bee guts.

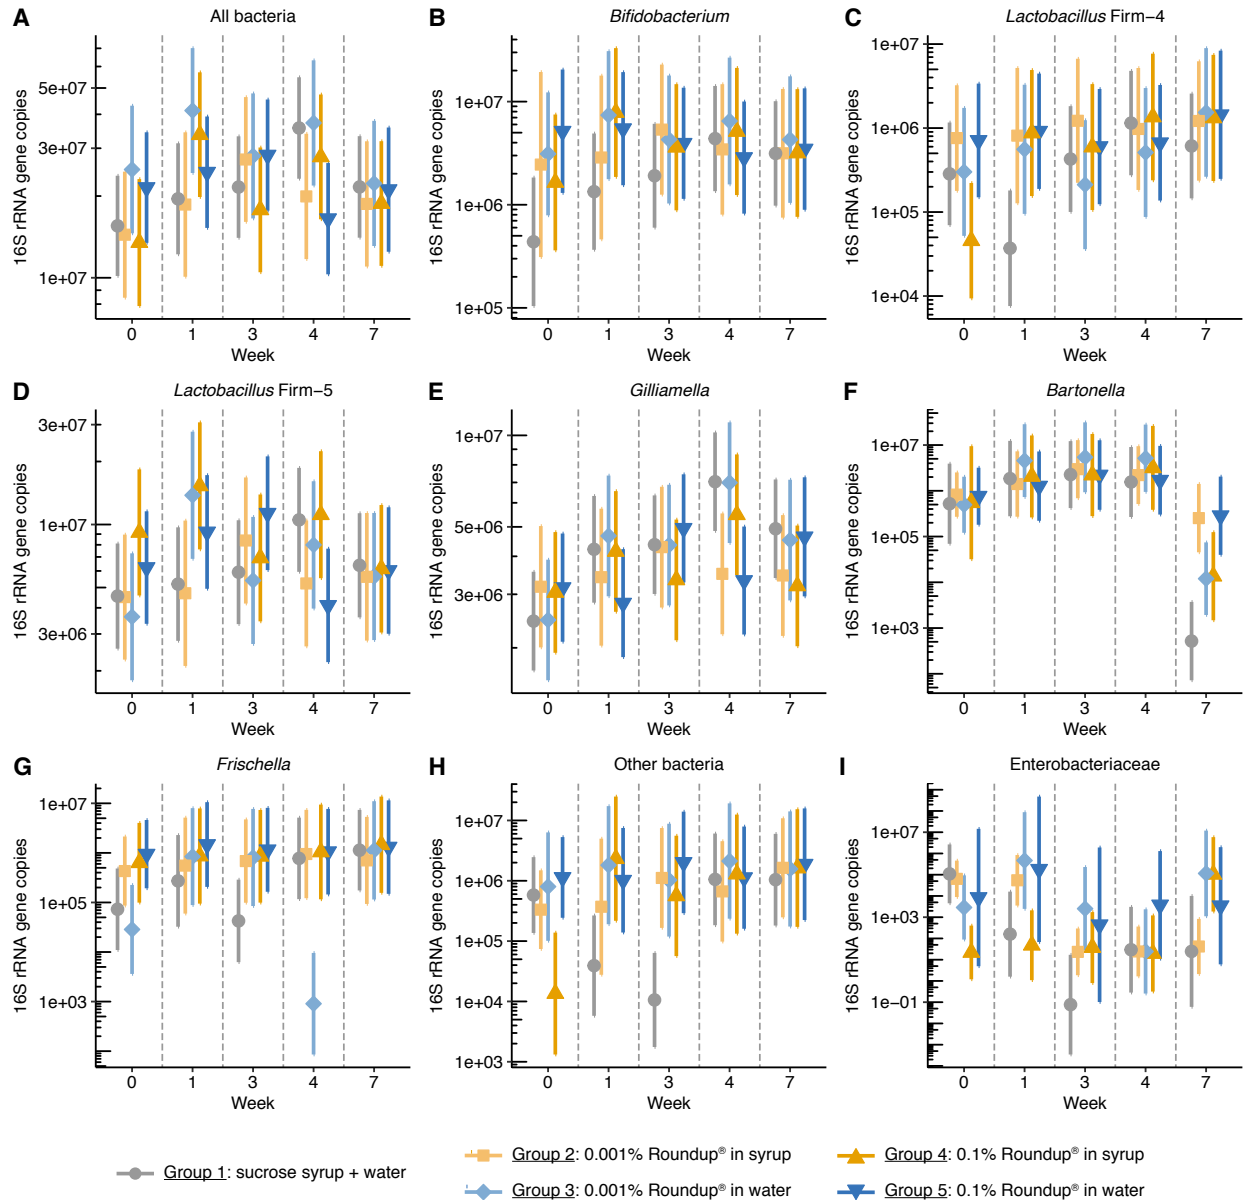

**Figure S6. Gut microbial perturbations in honey bees from hives exposed to 0.001% or 0.1% Roundup<sup>®</sup> in syrup or water in site 2, 2019.**

Scatter plots of estimates of absolute abundance for (A) total bacteria; (B) *Bifidobacterium*; (C) *Lactobacillus Firm-4*; (D) *Lactobacillus Firm-5*; (E) *Gilliamella*; (F) *Bartonella*; (G) *Frischella*; (H) and other bacteria, including (I) Enterobacteriaceae in the guts of bees sampled from control (sucrose syrup + water) and treatment (0.001% or 0.1% Roundup<sup>®</sup> in syrup or water) groups on weeks 0, 1, 3, 4 and 7, with error bars of 95% confidence interval. For group 1: n = 6 for weeks 0, 3, 4 and 7; n = 5 for week 1. For group 2: n = 4 for weeks 0, 3, 4 and 7; n = 3 for week 1. For groups 3 and 4: n = 4. For group 5: n = 5 for weeks 0, 1, 3 and 4; n = 4 for week 7. Each hive is represented by 15 pooled bee guts.



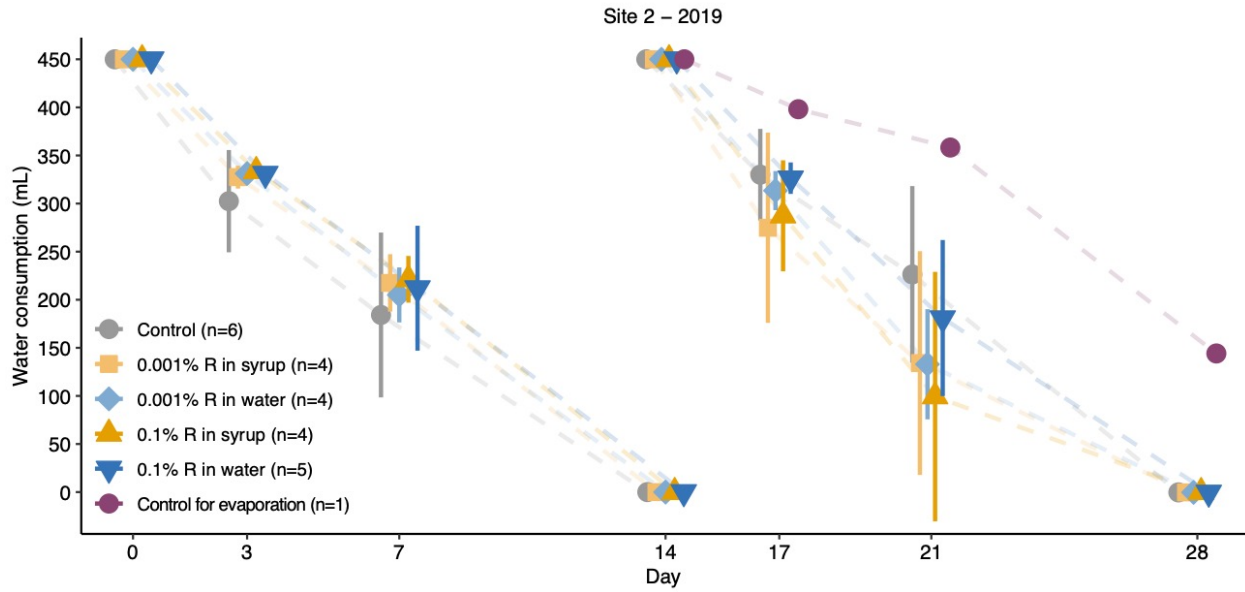

**Figure S7. Estimates of water consumption in hives from site 2, 2019.** Scatter plots of water or formulation in water consumption in control and treatment hives, respectively, for a period of four weeks. Water or formulation in water were provided to each hive in a glass bottle with punched cap connected to a plastic boardman and attached to the hive entry. Water evaporation was evaluated after Week 2 by adding the same apparatus in an empty hive.

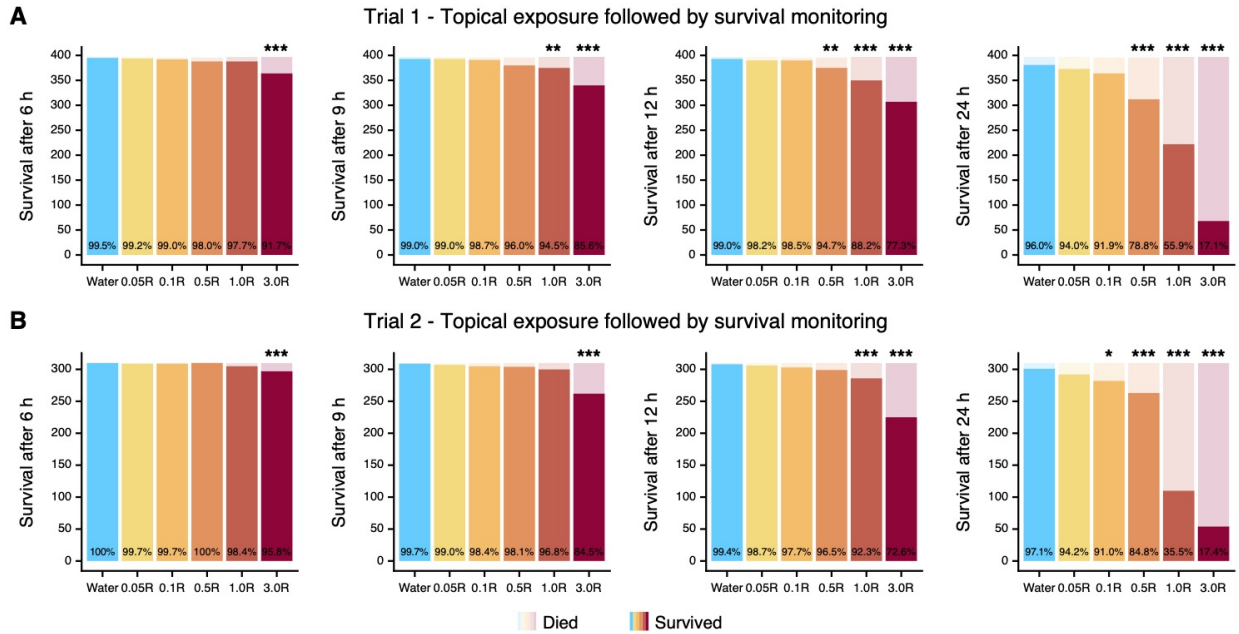

**Figure S8. Survival rates of honey bees topically exposed to Roundup® formulation under laboratory conditions.**

(A) Trial 1, also shown in Figure 6. (B) Trial 2. In both trials, survival rates were measured 6, 9, 12 and 24 hours after spraying worker bees with different concentrations of a glyphosate-based formulation in water (n = 8-9 cup cages per group, 35-40 bees per cup cage). \* $P < 0.05$ , \*\* $P < 0.01$ , \*\*\* $P < 0.001$ , Chi-squared test followed by Bonferroni correction

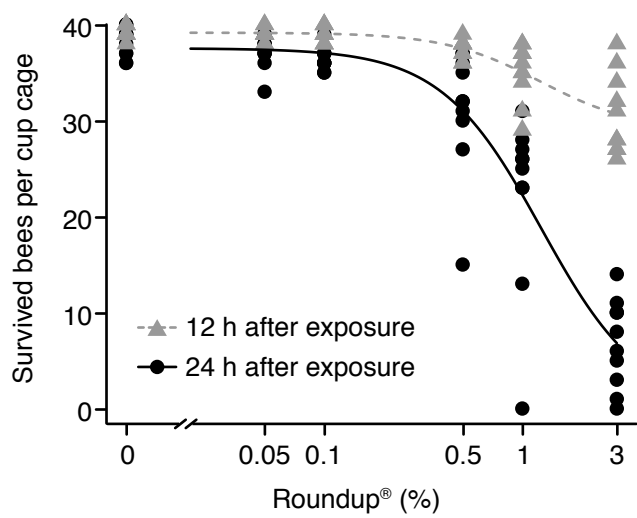

**Figure S9. Dose-response curves for survival rates of honey bees topically exposed to different concentrations of Roundup® formulation.**

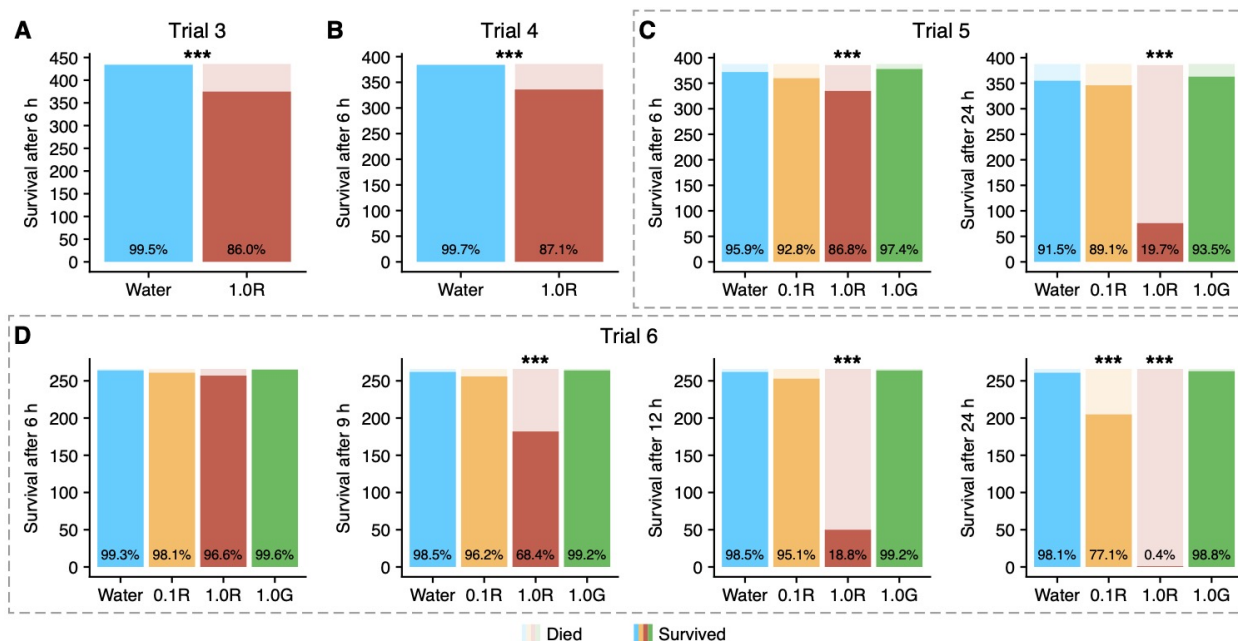

**Figure S10. Survival rates of honey bees topically exposed to glyphosate and Roundup® formulation under laboratory conditions.**

In (A) and (B), worker bees were split into 2 groups which were sprayed with either tap water or 1.0% Roundup® formulation in water. Survivorship was monitored for 6 hours under laboratory conditions (n = 10 cup cages per group, 35-40 bees per cup cage). In (C) and (D), worker bees were split into 4 groups which were sprayed with either tap water, 0.1% Roundup® in water, 1.0% Roundup® in water or 1.0% glyphosate in water. Survivorship was monitored for 24 hours under laboratory conditions (n = 10 cup cages per group, 35-40 bees per cup cage). \*\*\* $P < 0.001$ , Chi-squared test followed by Bonferroni correction.

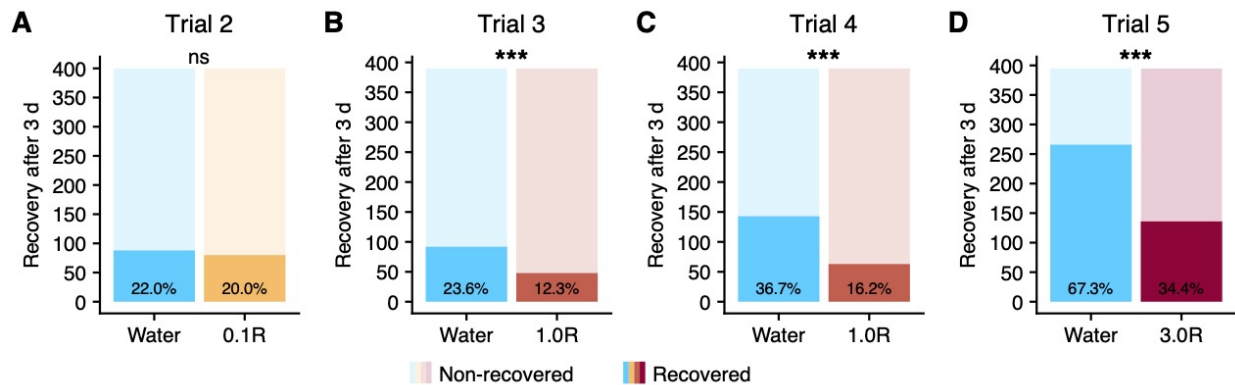

**Figure S11. Recovery rates of honey bees topically exposed to a glyphosate-based formulation under hive conditions.**

Worker bees were split into two groups which were marked on the thorax with blue or green paint. In each trial, groups were sprayed with either water or a specific concentration of a glyphosate-based formulation in water, **(A)** 0.1%, **(B)** and **(C)** 1.0%, **(D)** 3.0%, and released back to their hive ( $n = 10$  cup cages per group, 35-40 bees per replicate). All marked bees were recovered on day 3 post-spray. ns, non-significant, \*\*\* $P < 0.001$ , Chi-squared test followed by Bonferroni correction.

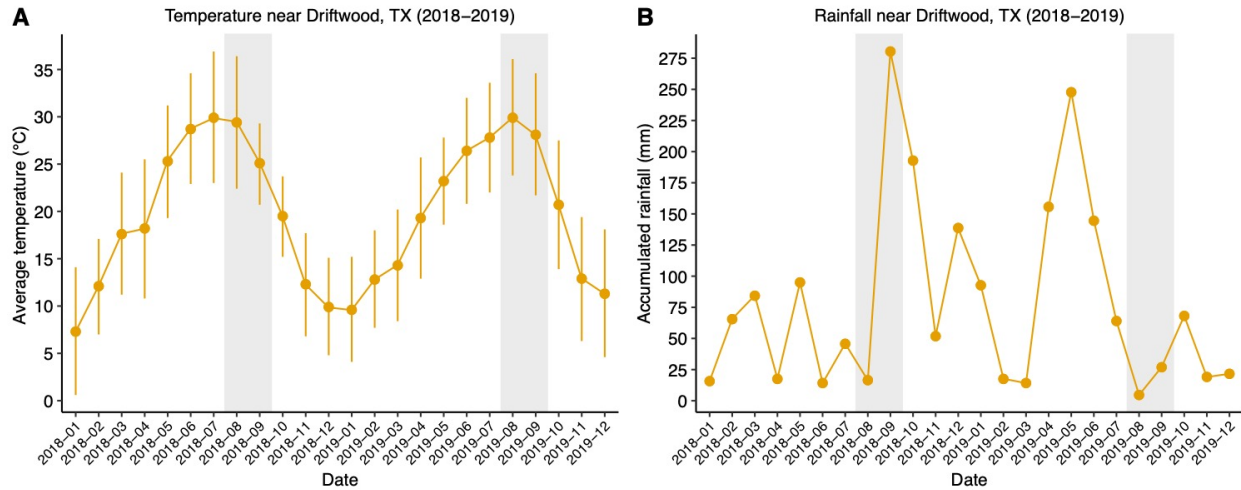

**Figure S12. Climate data for the region of Driftwood, TX, in the period of 2018-2019.**

**(A)** Monthly averages of temperature and **(B)** monthly accumulated rainfall data obtained from the automatic station of climate data collection Dripping Springs 6 E, TX US (USC00412585). Source: National Centers for Environmental Information (NCEI, [www.ncdc.noaa.gov](http://www.ncdc.noaa.gov)).

**Table S1.** Permanova results of Bray-Curtis and Weighted UniFrac dissimilarities for gut community compositions of age-controlled honey bees orally exposed to treatments under laboratory conditions.

| <b>Bray-Curtis Dissimilarity</b>      |            |             |              |            |         |         |
|---------------------------------------|------------|-------------|--------------|------------|---------|---------|
| method name                           | PERMANOVA  |             |              |            |         |         |
| test statistic name                   | pseudo-F   |             |              |            |         |         |
| sample size                           | 24         |             |              |            |         |         |
| number of groups                      | 3          |             |              |            |         |         |
| test statistic                        | 3.70252    |             |              |            |         |         |
| p-value                               | 0.001      |             |              |            |         |         |
| number of permutations                | 999        |             |              |            |         |         |
| <b>Pairwise permanova results</b>     |            |             |              |            |         |         |
| Group 1                               | Group 2    | Sample size | Permutations | pseudo-F   | p-value | q-value |
| Control                               | Glyphosate | 16          | 999          | 3.90132027 | 0.001   | 0.0015  |
| Control                               | Roundup    | 16          | 999          | 6.14771957 | 0.001   | 0.0015  |
| Glyphosate                            | Roundup    | 16          | 999          | 1.68063484 | 0.081   | 0.081   |
| <b>Weighted UniFrac Dissimilarity</b> |            |             |              |            |         |         |
| method name                           | PERMANOVA  |             |              |            |         |         |
| test statistic name                   | pseudo-F   |             |              |            |         |         |
| sample size                           | 24         |             |              |            |         |         |
| number of groups                      | 3          |             |              |            |         |         |
| test statistic                        | 4.46616    |             |              |            |         |         |
| p-value                               | 0.001      |             |              |            |         |         |
| number of permutations                | 999        |             |              |            |         |         |
| <b>Pairwise permanova results</b>     |            |             |              |            |         |         |
| Group 1                               | Group 2    | Sample size | Permutations | pseudo-F   | p-value | q-value |
| Control                               | Glyphosate | 16          | 999          | 4.42337273 | 0.008   | 0.012   |
| Control                               | Roundup    | 16          | 999          | 7.99143437 | 0.001   | 0.003   |
| Glyphosate                            | Roundup    | 16          | 999          | 2.21440432 | 0.053   | 0.053   |

**Table S2.** Permanova results of Bray-Curtis and weighted UniFrac dissimilarities for gut community compositions of honey bees orally exposed to 0.1% Roundup® and recovered at days 0, 3 and 5 post-treatment.

| <b>Bray-Curtis Dissimilarity</b>      |           |             |              |             |         |         |
|---------------------------------------|-----------|-------------|--------------|-------------|---------|---------|
| method name                           | PERMANOVA |             |              |             |         |         |
| test statistic name                   | pseudo-F  |             |              |             |         |         |
| sample size                           | 90        |             |              |             |         |         |
| number of groups                      | 6         |             |              |             |         |         |
| test statistic                        | 2.89958   |             |              |             |         |         |
| p-value                               | 0.001     |             |              |             |         |         |
| number of permutations                | 999       |             |              |             |         |         |
| <b>Pairwise permanova results</b>     |           |             |              |             |         |         |
| Group 1                               | Group 2   | Sample size | Permutations | pseudo-F    | p-value | q-value |
| D0-C                                  | D0-T      | 30          | 999          | 0.618492438 | 0.815   | 0.815   |
| D0-C                                  | D3-C      | 30          | 999          | 0.638190516 | 0.76    | 0.8143  |
| D0-C                                  | D3-T      | 30          | 999          | 1.76256901  | 0.08    | 0.1     |
| D0-C                                  | D5-C      | 30          | 999          | 4.137791281 | 0.001   | 0.003   |
| D0-C                                  | D5-T      | 30          | 999          | 3.955942596 | 0.001   | 0.003   |
| D0-T                                  | D3-C      | 30          | 999          | 1.494438736 | 0.136   | 0.1569  |
| D0-T                                  | D3-T      | 30          | 999          | 2.002209517 | 0.035   | 0.0525  |
| D0-T                                  | D5-C      | 30          | 999          | 5.635417966 | 0.001   | 0.003   |
| D0-T                                  | D5-T      | 30          | 999          | 4.685699197 | 0.002   | 0.0043  |
| D3-C                                  | D3-T      | 30          | 999          | 2.573856554 | 0.003   | 0.0056  |
| D3-C                                  | D5-C      | 30          | 999          | 2.631917222 | 0.016   | 0.0267  |
| D3-C                                  | D5-T      | 30          | 999          | 4.150742984 | 0.001   | 0.003   |
| D3-T                                  | D5-C      | 30          | 999          | 4.982446668 | 0.001   | 0.003   |
| D3-T                                  | D5-T      | 30          | 999          | 1.791646927 | 0.08    | 0.1     |
| D5-C                                  | D5-T      | 30          | 999          | 3.752390141 | 0.002   | 0.0043  |
| <b>Weighted UniFrac Dissimilarity</b> |           |             |              |             |         |         |
| method name                           | PERMANOVA |             |              |             |         |         |
| test statistic name                   | pseudo-F  |             |              |             |         |         |
| sample size                           | 90        |             |              |             |         |         |
| number of groups                      | 6         |             |              |             |         |         |
| test statistic                        | 3.91951   |             |              |             |         |         |
| p-value                               | 0.001     |             |              |             |         |         |
| number of permutations                | 999       |             |              |             |         |         |
| <b>Pairwise permanova results</b>     |           |             |              |             |         |         |
| Group 1                               | Group 2   | Sample size | Permutations | pseudo-F    | p-value | q-value |
| D0-C                                  | D0-T      | 30          | 999          | 0.113830359 | 0.981   | 0.981   |
| D0-C                                  | D3-C      | 30          | 999          | 1.283408518 | 0.277   | 0.2968  |
| D0-C                                  | D3-T      | 30          | 999          | 1.58824016  | 0.186   | 0.2325  |
| D0-C                                  | D5-C      | 30          | 999          | 6.130568942 | 0.001   | 0.0025  |
| D0-C                                  | D5-T      | 30          | 999          | 6.403509713 | 0.001   | 0.0025  |
| D0-T                                  | D3-C      | 30          | 999          | 2.045786614 | 0.075   | 0.1023  |
| D0-T                                  | D3-T      | 30          | 999          | 1.34839217  | 0.227   | 0.2619  |
| D0-T                                  | D5-C      | 30          | 999          | 7.337864044 | 0.002   | 0.0043  |
| D0-T                                  | D5-T      | 30          | 999          | 7.04935978  | 0.001   | 0.0025  |
| D3-C                                  | D3-T      | 30          | 999          | 3.877954422 | 0.007   | 0.0131  |
| D3-C                                  | D5-C      | 30          | 999          | 2.252614238 | 0.07    | 0.1023  |
| D3-C                                  | D5-T      | 30          | 999          | 5.818113513 | 0.001   | 0.0025  |
| D3-T                                  | D5-C      | 30          | 999          | 7.831137128 | 0.001   | 0.0025  |
| D3-T                                  | D5-T      | 30          | 999          | 3.216409879 | 0.018   | 0.03    |
| D5-C                                  | D5-T      | 30          | 999          | 5.586797101 | 0.001   | 0.0025  |



**Table S3.** Oral exposure experiments followed by hive recovery.

| <b>Experiment</b> | <b>Season</b> | <b>Hive ID</b> | <b>Group treatment</b> | <b>Color</b> | <b>Released bees</b> |
|-------------------|---------------|----------------|------------------------|--------------|----------------------|
| 1                 | Fall, 2018    | 8, Imperial*   | Sucrose syrup          | White        | 348                  |
|                   |               |                | 0.1% Roundup® in syrup | Pink         | 348                  |
| 2                 | Spring, 2019  | 9, Alsatian    | Sucrose syrup          | White        | 330                  |
|                   |               |                | 0.1% Roundup® in syrup | Pink         | 330                  |
| 3                 | Spring, 2019  | 8, Labrador    | Sucrose syrup          | Pink         | 390                  |
|                   |               |                | 0.1% Roundup® in syrup | White        | 390                  |
| 4                 | Summer, 2019  | 8, Labrador    | Sucrose syrup          | Pink         | 353                  |
|                   |               |                | 0.1% Roundup® in syrup | White        | 353                  |
| 5                 | Summer, 2019  | 8, Labrador    | Sucrose syrup          | White        | 440                  |
|                   |               |                | 0.1% Roundup® in syrup | Pink         | 440                  |
| Validation        | Summer, 2019  | 9, Alsatian    | Sucrose syrup          | Pink         | 178                  |
|                   |               |                | Sucrose syrup          | White        | 176                  |

\* This hive died in Winter, 2018.

**Table S4.** Treatment scheme performed in the field experiments.

| Time                     | Site     | Group   | Number of hives          | Treatment              | Week |   |   |   |   |   |  |
|--------------------------|----------|---------|--------------------------|------------------------|------|---|---|---|---|---|--|
|                          |          |         |                          |                        | 0    | 1 | 2 | 3 | 4 | 7 |  |
| Aug/Sep<br>2018          | 1        | Control | 5                        | Sucrose syrup          | X    | X | X | X |   |   |  |
|                          |          | 0.1R-S  | 5                        | 0.1% Roundup® in syrup | X    | X | X | X |   |   |  |
|                          | 1        | Control | 5                        | Sucrose syrup          | X    | X | X | X |   |   |  |
| 0.001R-S                 |          | 5       | 0.001% Roundup® in syrup | X                      | X    | X | X |   |   |   |  |
| 0.1R-S                   |          | 4       | 0.1% Roundup® in syrup   | X                      | X    | X | X |   |   |   |  |
| Aug/Sep<br>2019          |          | Control | 6                        | Sucrose syrup          | X    |   |   |   |   |   |  |
|                          |          | Water   |                          |                        | X    |   | X |   |   |   |  |
|                          | 0.001R-S | 4       | 0.001% Roundup® in syrup | X                      |      |   |   |   |   |   |  |
|                          |          |         | Water                    | X                      |      | X |   |   |   |   |  |
|                          | 2        | 0.1R-S  | 4                        | 0.1% Roundup® in syrup | X    |   |   |   |   |   |  |
|                          |          |         |                          | Water                  | X    |   | X |   |   |   |  |
|                          | 0.001R-W | 4       | Sucrose syrup            | X                      |      |   |   |   |   |   |  |
| 0.001% Roundup® in water |          |         | X                        |                        | X    |   |   |   |   |   |  |
| 0.1R-W                   |          |         | 5                        | Sucrose syrup          | X    |   |   |   |   |   |  |
|                          |          | 0.1R-W  | 5                        | 0.1% Roundup® in water | X    |   | X |   |   |   |  |

**Table S5.** Topical exposure experiments performed under laboratory conditions.

| <b>Experiment</b> | <b>Season</b> | <b>Hive ID</b> | <b>Group treatment</b>   | <b># Cup cages</b> | <b># Bees</b> | <b>Survival monitoring</b>   |
|-------------------|---------------|----------------|--------------------------|--------------------|---------------|------------------------------|
| 1                 | Spring, 2019  | 3, Firefly     | Water                    | 12                 | 436           | 6 h post-spray               |
|                   |               |                | 1.0% Roundup® in water   | 12                 | 436           |                              |
| 2                 | Summer, 2019  | 3, Firefly     | Water                    | 10                 | 385           | 6 h post-spray               |
|                   |               |                | 1.0% Roundup® in water   | 10                 | 385           |                              |
| 3                 | Summer, 2019  | 3, Firefly     | Water                    | 10                 | 388           | 6 and 24 h post-spray        |
|                   |               |                | 0.1% Roundup® in water   | 10                 | 386           |                              |
|                   |               |                | 1.0% Roundup® in water   | 10                 | 388           |                              |
|                   |               |                | 1.0% glyphosate in water | 10                 | 388           |                              |
| 4                 | Summer, 2019  | 0, Avocado     | Water                    | 7                  | 266           | 6, 9, 12 and 24 h post-spray |
|                   |               |                | 0.1% Roundup® in water   | 7                  | 266           |                              |
|                   |               |                | 1.0% Roundup® in water   | 7                  | 266           |                              |
|                   |               |                | 1.0% glyphosate in water | 7                  | 266           |                              |
| 5                 | Fall, 2019    | 1, Leviathan   | Water                    | 8                  | 310           | 6, 9, 12 and 24 h post-spray |
|                   |               |                | 0.05% Roundup® in water  | 8                  | 310           |                              |
|                   |               |                | 0.1% Roundup® in water   | 8                  | 310           |                              |
|                   |               |                | 0.5% Roundup® in water   | 8                  | 310           |                              |
|                   |               |                | 1.0% Roundup® in water   | 8                  | 310           |                              |
|                   |               |                | 3.0% Roundup® in water   | 8                  | 310           |                              |
| 6                 | Fall, 2019    | 6, Pyrenees    | Water                    | 10                 | 397           | 6, 9, 12 and 24 h post-spray |
|                   |               |                | 0.05% Roundup® in water  | 10                 | 397           |                              |
|                   |               |                | 0.1% Roundup® in water   | 10                 | 397           |                              |
|                   |               |                | 0.5% Roundup® in water   | 10                 | 397           |                              |
|                   |               |                | 1.0% Roundup® in water   | 10                 | 397           |                              |
|                   |               |                | 3.0% Roundup® in water   | 10                 | 397           |                              |

**Table S6.** Topical exposure experiments followed by hive recovery.

| <b>Experiment</b> | <b>Season</b> | <b>Hive ID</b>  | <b>Group treatment</b>              | <b>Color</b> | <b>Bees released</b> |
|-------------------|---------------|-----------------|-------------------------------------|--------------|----------------------|
| 1                 | Fall, 2019    | 2, Newfoundland | Tap water                           | Green        | 400                  |
|                   |               |                 | 0.1% Roundup <sup>®</sup> in water  | Blue         | 400                  |
| 2                 | Fall, 2019    | 2, Newfoundland | Tap water                           | Green        | 390                  |
|                   |               |                 | 1.0% Roundup <sup>®</sup> in water  | Blue         | 390                  |
| 3                 | Fall, 2019    | 2, Newfoundland | Tap water                           | Green        | 390                  |
|                   |               |                 | 1.0% Roundup <sup>®</sup> in water  | Blue         | 390                  |
| 4                 | Fall, 2019    | 2, Newfoundland | Tap water                           | Green        | 395                  |
|                   |               |                 | 3.0% Roundup <sup>®</sup> in water  | Blue         | 395                  |
| 5                 | Fall, 2019    | 6, Pyrenees     | Tap water                           | White        | 260                  |
|                   |               |                 | 0.05% Roundup <sup>®</sup> in water | Green        | 260                  |
|                   |               |                 | 0.1% Roundup <sup>®</sup> in water  | Orange       | 260                  |
|                   |               |                 | 0.5% Roundup <sup>®</sup> in water  | Pink         | 260                  |
|                   |               |                 | 1.0% Roundup <sup>®</sup> in water  | Yellow       | 260                  |
|                   |               |                 | 3.0% Roundup <sup>®</sup> in water  | Blue         | 260                  |

## References

1. Bates D, Mächler M, Bolker B, Walker S. 2015. Fitting linear mixed-effects models using lme4. *J Stat Softw* 67:1–48.
2. Lenth R, Singmann H, Love J, Buerkner P, Herve M. 2019. emmeans: Estimated Marginal Means, aka Least-Squares Means.
